# Supplementary material for: Green electro-organic synthesis of a novel catechol derivative based on o-benzoquinone nucleophilic addition
Source: Royal Society of Chemistry journal article supplement (doi:10.1039/d2nj04530c), 2022-11-30
Supplement: d2nj04530c1.pdf [file d2nj04530c1.pdf]

1  
proton\_su D2O (C:\nmr-data) Student 19

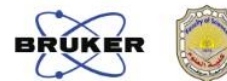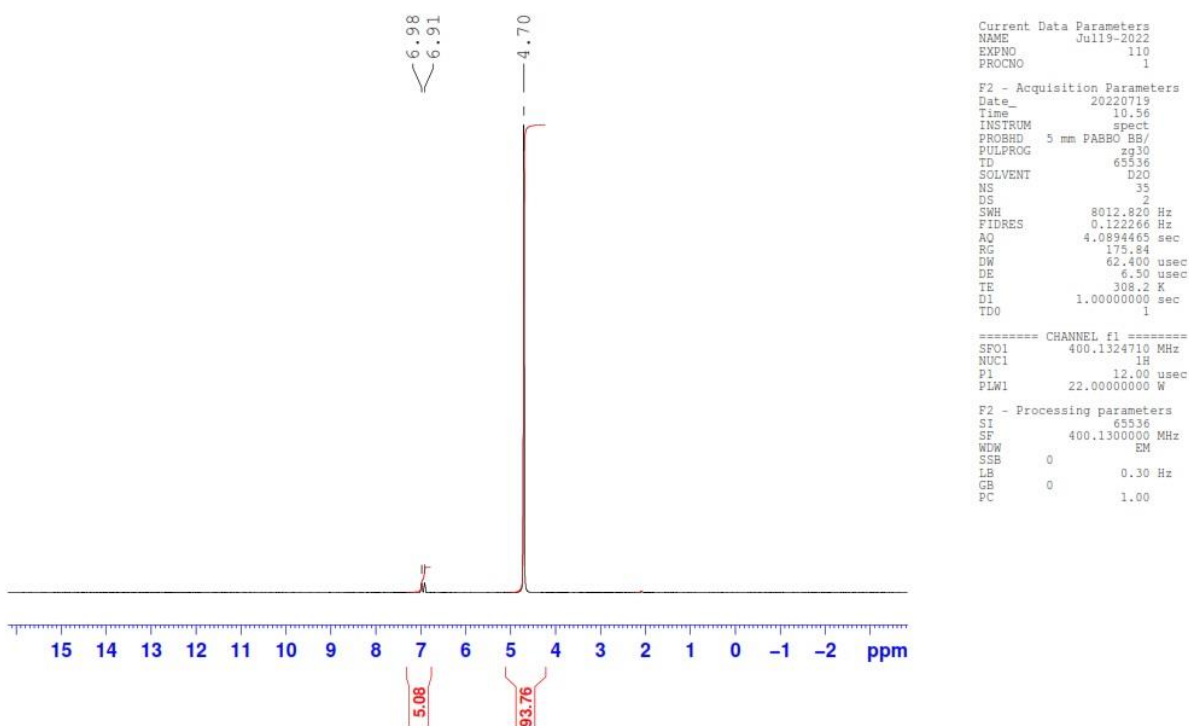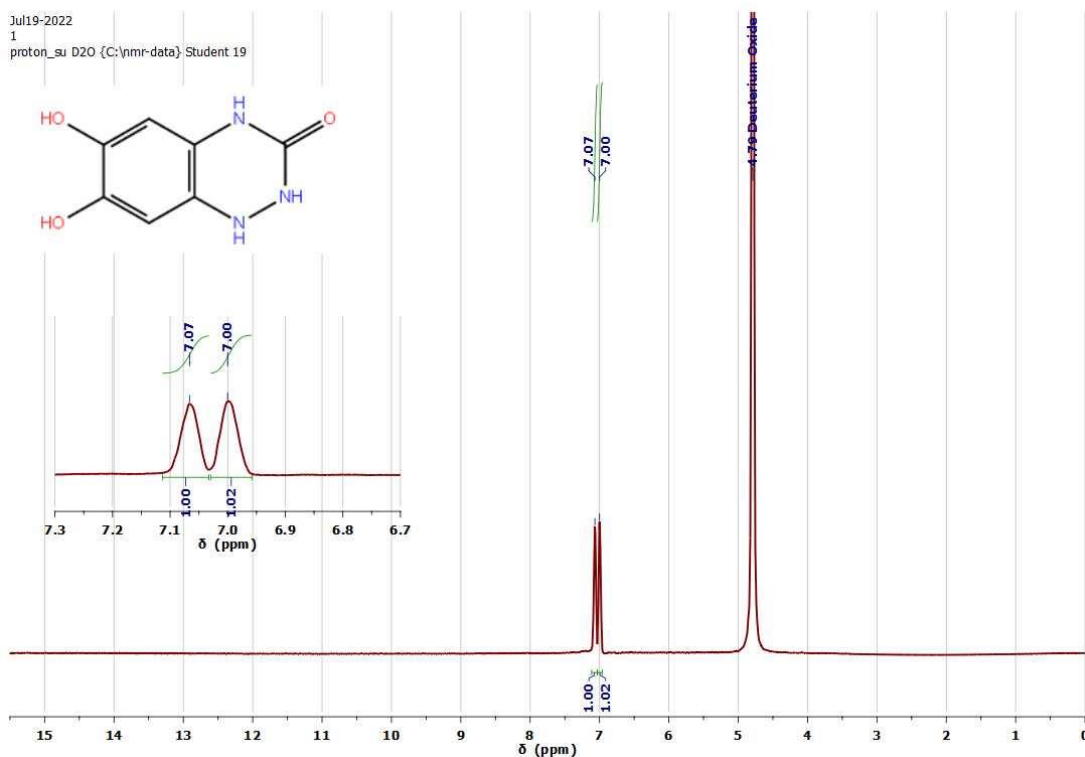

Fig. S1. <sup>1</sup>H NMR spectra of Triazinone (9) Product in D<sub>2</sub>O.

1  
c13\_su D2O (C:\nmr-data) Student 19

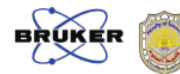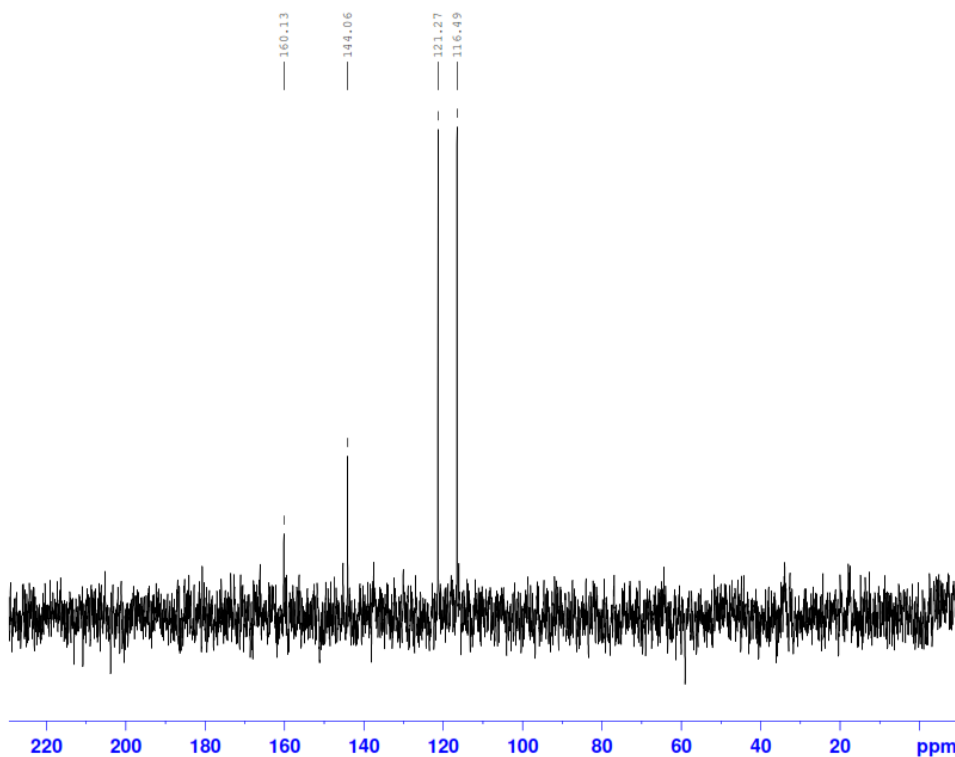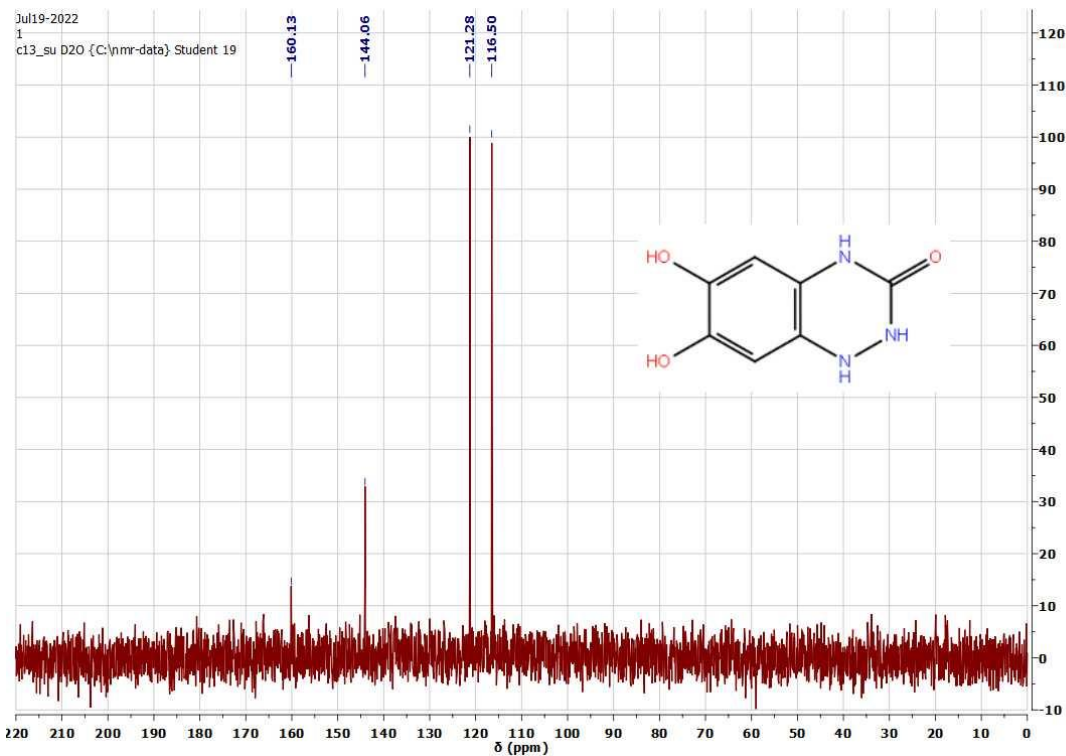

Fig. S2.  $^{13}\text{C}$  NMR spectra of Triazinone (9) Product in  $\text{D}_2\text{O}$ .

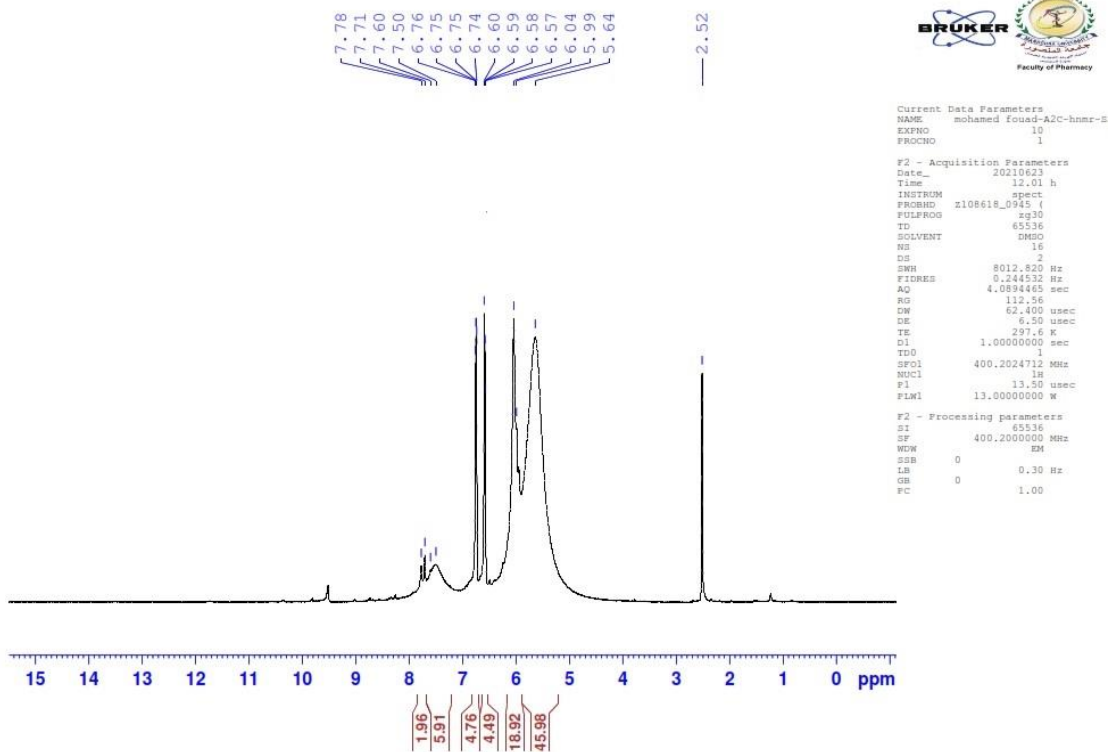

Fig. S3. <sup>1</sup>H NMR spectra of Triazinone (9) Product in DMSO.

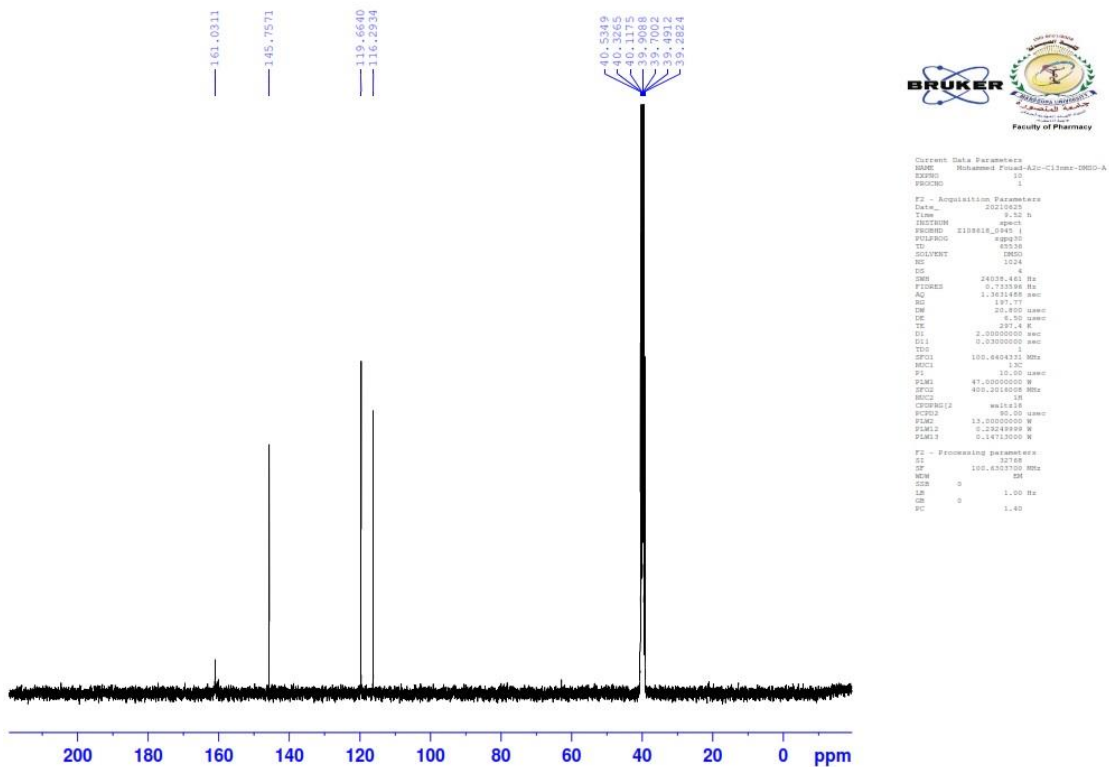

Fig. S4. <sup>13</sup>C NMR spectra of Triazinone (9) Product in DMSO.

GC

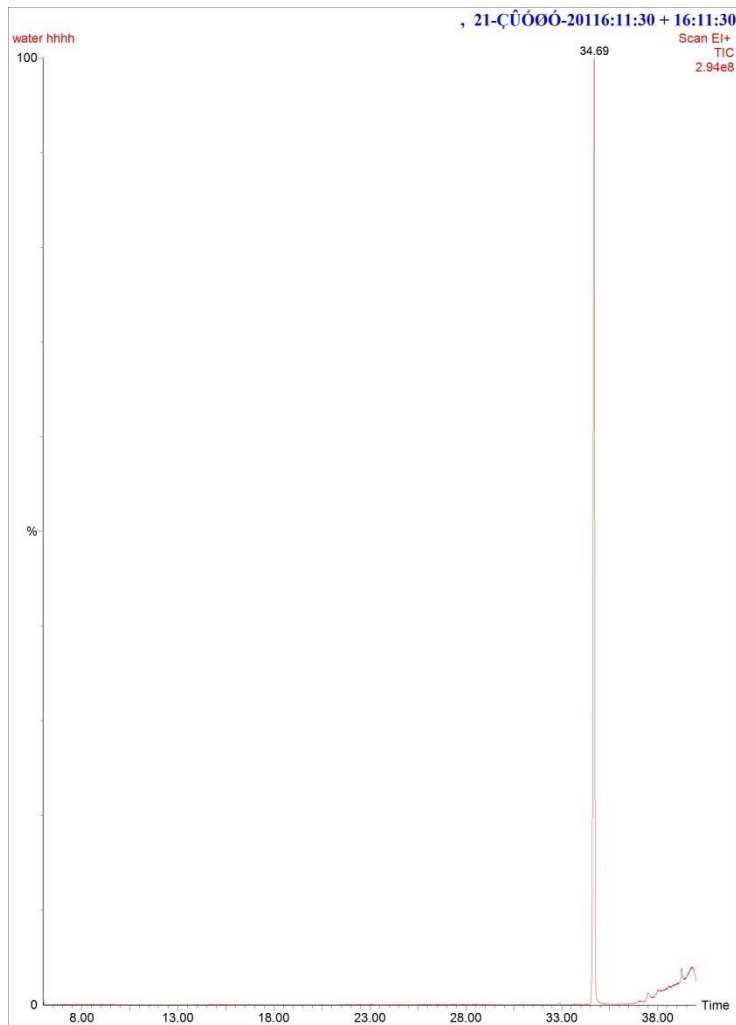

MS

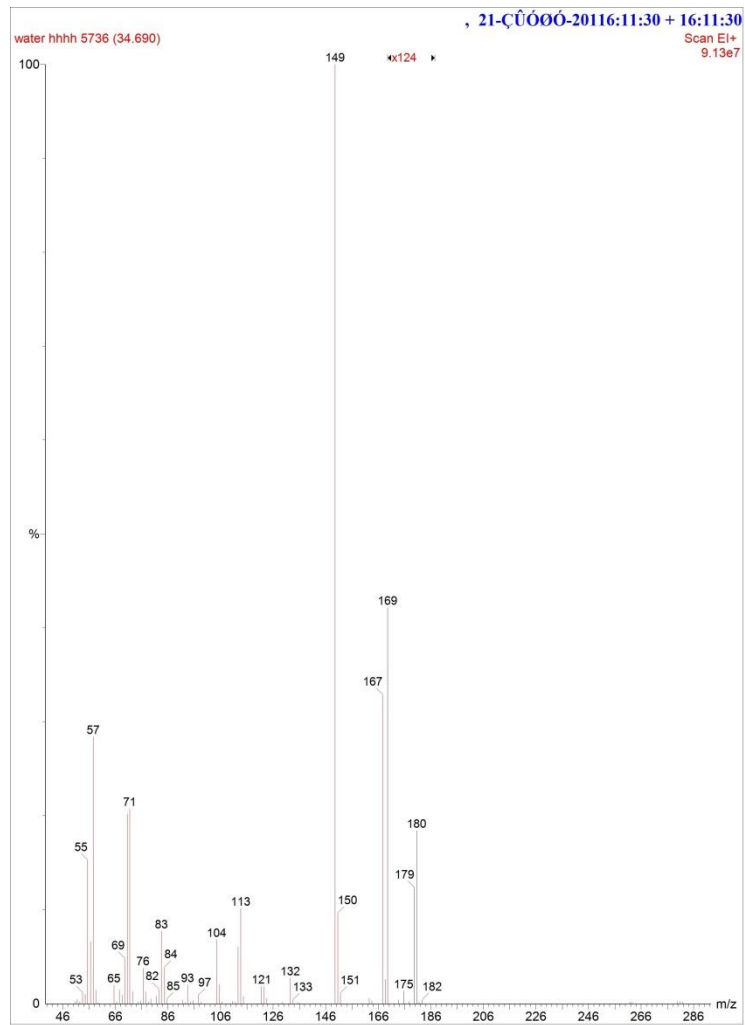

Fig. S5. GC/MS spectra of Triazinone (9) Product.
